# Supplementary material for: The Role of Appearance-Related Stereotypes in Shaping Health Behaviors: A Mediation Analysis Involving the Cognitive-Emotional Component of Body Image
Source: Research Square preprint supplement (doi:10.21203/rs.3.rs-7194768/v1), 2025-09-05
Supplement: Supplementary file 1 [file ed061e40ff445dcdd32b3396.docx]

**Information for the study participant**

**Dear Madam,**

I am a second-year Master's student in Nursing at the Faculty of Health Sciences, Jagiellonian University Medical College in Kraków.

I would like to kindly invite you to complete the following questionnaire, which aims to explore your experiences related to how body image perception influences health behaviors in the context of online exposure. Your responses will contribute valuable data for my master’s thesis and the preparation of a scientific article.

The study involves a one-time completion of the questionnaire. Eligibility criteria include identifying as female, being between 18 and 65 years of age, residing in the Małopolska region, and having access to the Internet.

In most questions, please select one answer. If multiple responses are possible, this will be clearly indicated in the question.

Participation in this study is entirely voluntary and anonymous. You will not be asked to provide any personal or sensitive data. Completion of the questionnaire is considered as providing informed consent to participate in the study. You may decline to participate or withdraw from the study at any point without giving a reason.

The estimated time to complete the questionnaire is approximately 15 minutes.
If you have any questions or concerns, please feel free to contact me at: z.smigiel@student.uj.edu.pl

Thank you very much for your time and contribution!

**Sociodemographic data**

Age:

1. 18-25
2. 26-35
3. 36-55
4. 56- 65

Education

1. Basic education
2. Vocational
3. Secondary
4. Higher

Place of residence

1. Village
2. City up to 50,000 inhabitants
3. City with 50,000 to 150,000 inhabitants
4. City with 150-500 thousand inhabitants
5. City with more than 500,000 inhabitants

Professional situation

1. I study
2. I work
3. I am retired
4. I don't work

**SURVEY QUESTIONNAIRE OF MY OWN AUTHORSHIP**

1. What is your dominant source of information about preventive healthcare? Please select one answer:

a) Medical personnel

b) Television

b) Internet

c) Work

d) Books, guides

e) Family, friends

f) Radio

2. How many hours a day do you spend online?

a) Less than 1 hour a day

b) 1-2 hours a day

c) 3-4 hours a day

d) 5-6 hours a day

e) More than 7 hours a day

3. What online sources do you use for preventative health care? You can select more than one answer.

a) Health-related websites (e.g., www.poradnikzdrowie.pl, medonet.pl)

b) Health discussion forums (e.g., forum.gazeta.pl)

c) Social media platforms (e.g., Facebook, Instagram, TikTok)

d) Scientific articles

e) Other, what are they?

4. If you answered the question above using social media platforms, please indicate which social media platforms you use to learn about health. You can select more than one answer.

a) Facebook

b) YouTube

c) TikTok

d) Pinterest

e) Twitter

f) Instagram

g) Other, specify?

5. Do you use the internet more often for:

a) Preventative health care

b) Seeking information about illness

6. Do you think that using mobile apps can help you better manage your health?

a) Yes

b) No

7. Do you think that online advertisements for diets, supplements, or beauty treatments have a positive impact on health-related decisions?

a) Definitely not

b) Probably not

c) No opinion

d) Probably yes

d) Definitely yes

8. Have you changed your risky behavior into health-promoting behavior as a result of information available online?

a) No

b) Yes

9. If you answered yes to question 8, please select or add your own suggestion: What was this change?

a) Weight loss

b) Weight gain

c) Improved eating habits

d) Improved sleep duration and quality

e) Vitamin supplementation, etc.

f) Increased physical activity

g) Changed mental attitude

h) Quitting an addiction, what kind? ………………………………………………………………..

i) Other, what kind? ………………………………………………………….………………………

10. How do you rate the credibility of health-related content available on the Internet?

a) Definitely not credible

b) Rather credible

c) No opinion

d) Rather credible

e) Definitely credible

11. Do you believe that online content related to body image influences your choices regarding a healthy lifestyle?

a) Definitely not

b) Probably not

c) No opinion

d) Probably yes

d) Definitely yes

12. Do you ever go on restrictive diets because of body imagery in the media?

a) Definitely not

b) Probably not

c) No opinion

d) Probably yes

d) Definitely yes

13. To what extent do you believe that the media create unrealistic standards of female body beauty?

a) Definitely not

b) Probably not

c) No opinion

d) Probably yes

d) Definitely yes

14. Does viewing retouched photos of models affect your self-esteem?

a) Definitely not

b) Probably not

c) No opinion

d) Probably yes

d) Definitely yes

15. Do you ever engage in excessive physical activity because of the influence of body images in the media?

a) Definitely not

b) Probably not

c) No opinion

d) Probably yes

d) Definitely yes

16. Do you ever avoid posting photos of your body on social media for fear of negative comments?

a) Definitely not

b) Probably not

c) No opinion

d) Probably yes

d) Definitely yes

17. To what extent are your health-promoting behavior choices dictated by health issues, and to what extent by appearance? a) solely for health

b) Rather for health

c) Equally for health and appearance

d) Rather for appearance

e) Solely for appearance

**Questionnaire – Health Behavior Inventory (HBI)**

Below are examples of various health-related behaviors. How often do you engage in the behaviors listed below during the year?

Please answer honestly by entering the appropriate number in each box:

1 – "almost never"

2 – "rarely"

3 – "from time to time"

4 – "often"

5 – "almost always"

| No. | Statement | Almost never | Rarely | From time to time | Often | Almost always |
| --- | --- | --- | --- | --- | --- | --- |
| 1. | I eat plenty of vegetables and fruit. |  |  |  |  |  |
| 2. | I avoid colds. |  |  |  |  |  |
| 3. | I take seriously the advice of people who express concern about my health. |  |  |  |  |  |
| 4. | I get enough rest. |  |  |  |  |  |
| 5. | I limit my consumption of foods such as animal fats and sugar. |  |  |  |  |  |
| 6. | I have the emergency services numbers written down. (Do I remember)? |  |  |  |  |  |
| 7. | I avoid situations that depress me. |  |  |  |  |  |
| 8. | I avoid overwork. |  |  |  |  |  |
| 9. | I maintain a proper diet. |  |  |  |  |  |
| 10. | I follow the medical recommendations based on my tests. |  |  |  |  |  |
| 11. | I try to avoid excessive emotions, stress, and tension. |  |  |  |  |  |
| 12. | I control my body weight. |  |  |  |  |  |
| 13. | I avoid eating foods with preservatives. |  |  |  |  |  |
| 14. | I regularly have medical checkups. |  |  |  |  |  |
| 15. | I have friends and a well-balanced family life. |  |  |  |  |  |
| 16. | I get enough sleep. |  |  |  |  |  |
| 17. | I avoid salt and heavily salted foods. |  |  |  |  |  |
| 18. | I try to learn how others avoid illness. |  |  |  |  |  |
| 19. | I avoid feelings such as anger and anxiety. |  |  |  |  |  |
| 20. | I limit smoking. |  |  |  |  |  |
| 21. | I eat whole-grain bread. |  |  |  |  |  |
| 22. | I try to obtain medical information and understand the causes of health and illness. |  |  |  |  |  |
| 23. | I think positively. |  |  |  |  |  |
| 24. | I avoid excessive physical exertion. |  |  |  |  |  |

**Body Image Questionnaire (BQQ)**

Below you will find statements expressing various attitudes towards values, lifestyles, and interpersonal relationships. Consider and answer the extent to which these statements align with your own views.

1 – "I strongly disagree"

2 – "I disagree"

3 – "I don't know"

4 – "I agree"

5 – "I strongly agree"

|  | I strongly disagree | I disagree | | I don't know | | I agree | | I strongly agree | |
| --- | --- | --- | --- | --- | --- | --- | --- | --- | --- |
| 1. Men are more attracted to thin women. |  |  | |  | |  | |  | |
| 2. I am satisfied with my appearance. |  |  | |  | |  | |  | |
| 3. I dress to conceal imperfections in my figure. |  |  | |  | |  | |  | |
| 4. I feel pressure from my immediate environment to lose weight. |  |  | |  | |  | |  | |
| 5. Thin people are more successful in life. |  |  | |  | |  | |  | |
| 6. When I realize how much I weigh, I get into a bad mood. |  |  | |  | |  | |  | |
| 7. I enjoy active recreation. |  |  | |  | |  | |  | |
| 8. I feel physically attractive. |  |  | |  | |  | |  | |
| 9. I think clothes look better on thin women. |  |  | |  | |  | |  | |
| 10. I feel angry about my body. |  |  | |  | |  | |  | |
| 11. I lead an active lifestyle. |  |  | |  | |  | |  | |
| 12. Obese people have trouble finding work. |  |  | |  | |  | |  | |
| 13. I am a happy person. |  |  | |  | |  | |  | |
| 14. I often hear critical comments about my appearance. |  |  | |  | |  | |  | |
| 15. It's easier for thin women to find a job. |  |  | |  | |  | |  | |
| 16. Some people make fun of my appearance. |  |  | |  | |  | |  | |
| 17. I'm very afraid of gaining weight. |  |  | |  | |  | |  | |
| 18. I hate my body. |  |  | |  | |  | |  | |
| 19. I've always felt I was too fat. |  |  | |  | |  | |  | |
| 20. I like to play sports. |  |  | |  | |  | |  | |
| 21. People think obese people are out of control. |  |  | |  | |  | |  | |
| 22. Slim people are much happier. |  |  | |  | |  | |  | |
| 23. I feel accepted by those around me. |  |  | |  | |  | |  | |
| 24. Slim women are more attractive. |  | |  | |  | |  | |  |
| 25. I'm on a weight-loss diet. |  | |  | |  | |  | |  |
| 26. Handsome, well-built men have an easier time finding work. |  | |  | |  | |  | |  |
| 27. I worry about my appearance. |  | |  | |  | |  | |  |
| 28. People tell jokes about my figure. |  | |  | |  | |  | |  |
| 29. I think I'm too fat. |  | |  | |  | |  | |  |
| 30. I feel rejected because of my weight. |  | |  | |  | |  | |  |
| 31. Sometimes I'm ashamed of how I look. |  | |  | |  | |  | |  |
| 32. I often think about losing weight. |  | |  | |  | |  | |  |
| 33. Women are more attracted to handsome, well-built men. |  | |  | |  | |  | |  |
| 34. I think my hips are too big. |  | |  | |  | |  | |  |
| 35. I exercise regularly. |  | |  | |  | |  | |  |
| 36. I am happy with my weight. |  | |  | |  | |  | |  |
| 37. I feel better when I lose weight. |  | |  | |  | |  | |  |
| 38. A slim body is preferred in our culture. |  | |  | |  | |  | |  |
| 39. I envy athletic people for their physiques. |  | |  | |  | |  | |  |
| 40. Obese people have a hard time finding a partner. |  | |  | |  | |  | |  |
